# Supplementary material for: Synergizing ICP-MS, STEM-EDXS, and SMPS single particle analytics exemplified by superlattice L10 Pt/Fe aerosol nanoparticles produced by spark ablation
Source: Royal Society of Chemistry journal article supplement (doi:10.1039/d4na00276h), 2024-01-01
Supplement: d4na00276h1.pdf [file d4na00276h1.pdf]

## Supplementary Information

### Synergizing ICP-MS, STEM-EDXS, and SMPS single particle analytics exemplified by superlattice L<sub>10</sub> Pt/Fe aerosol nanoparticles produced by spark ablation

Vinzent Olszok,<sup>a\*</sup> Philipp Rembe,<sup>a</sup> Tim Grieb,<sup>b</sup> Eshan J. Wijeyeratnam,<sup>a</sup> Andreas Rosenauer<sup>b</sup> and Alfred P. Weber<sup>a</sup>

<sup>a</sup> Clausthal University of Technology, Institute of Particle Technology, Leibnizstrasse 19, 38678 Clausthal-Zellerfeld, Germany

<sup>b</sup> University of Bremen, Institute of Solid State Physics, Department of Electron Microscopy, Otto-Hahn-Allee 1, 28359 Bremen, Germany

\*Corresponding author: vinzent.olszok@tu-clausthal.de

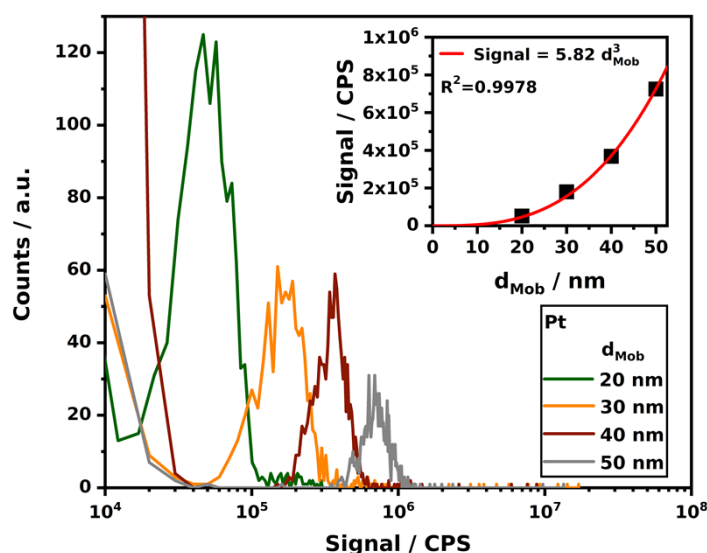

Fig. S1: Calibration of the spICP-MS device with spherical Pt NPs. The inset shows the derived mean signal response over the particle diameter.

Fig. S1 shows the raw data (signal distributions) of the spICP-MS, which was fed with spherical Pt aerosol NPs, classified at 20, 30, 40, and 50 nm by a DMA for a device calibration. From the mean signal response, a fit can be drawn to correlate the spICP-MS signal to a mobility-equivalent particle size (inset).

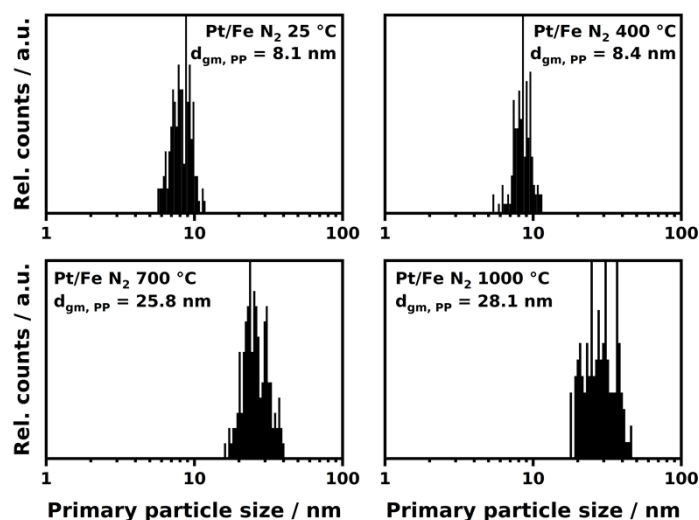

Fig. S2: Primary particle size distributions for subsequently progressing sintering of Pt/Fe agglomerates under N<sub>2</sub>.

Fig. S2 shows the primary particle size distributions of Pt/Fe agglomerate particles, which were sintered under N<sub>2</sub>. Interestingly, the TEM imaging revealed a larger primary particle size for Pt/Fe<sub>2</sub>O<sub>3</sub> NPs sintered at 700 °C compared to Pt/Fe NPs sintered under H<sub>2</sub> at the same temperature (see Fig. S6). It can be hypothesized that characteristic coalescence times may change for particles made of Pt/Fe<sub>2</sub>O<sub>3</sub>, Pt/Fe in fcc, or Pt/Fe in L<sub>10</sub> crystal configuration, which in turn may influence the primary particle structure at a certain temperature.

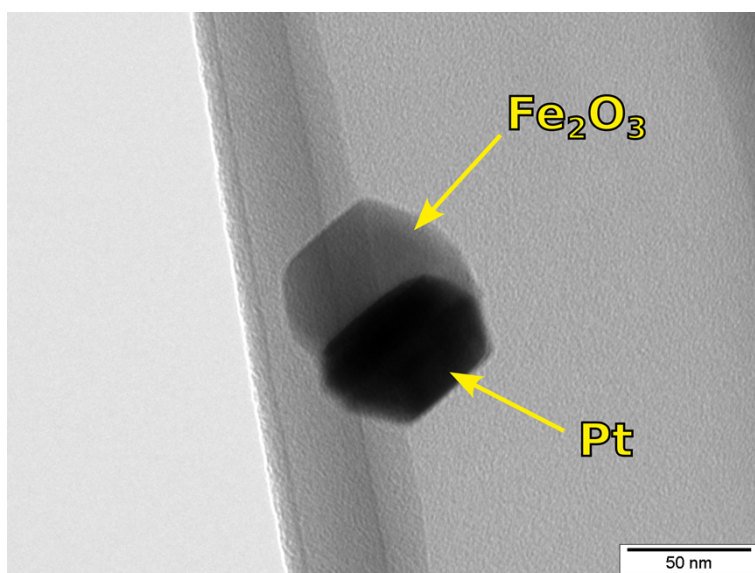

Fig. S3: TEM micrograph of Pt/Fe<sub>2</sub>O<sub>3</sub> NPs sintered at 1450 °C.

Fig. S3 shows the janus-like particle morphology of Pt/Fe<sub>2</sub>O<sub>3</sub> NPs after sintering at 1450 °C. The darker material can be assigned to Pt, and the brighter one to Fe<sub>2</sub>O<sub>3</sub>. Both segregated materials reached the thermodynamically favorable and compact sphere-like shape.

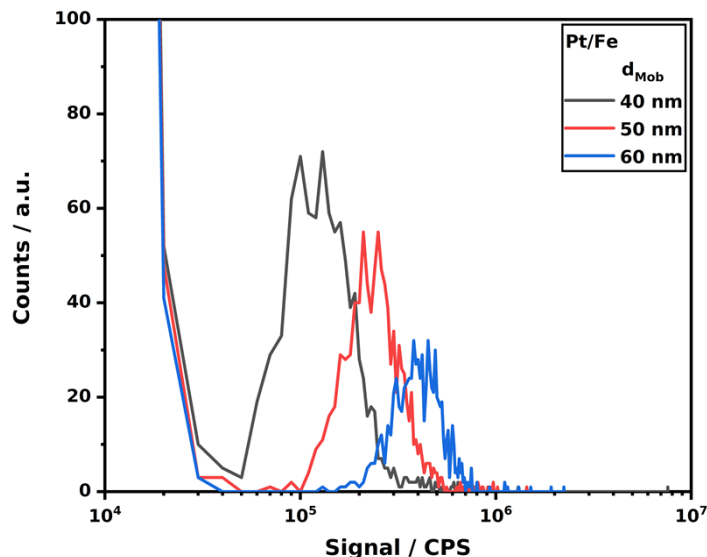

Fig. S4: spICP-MS signal response for Pt/Fe NPs.

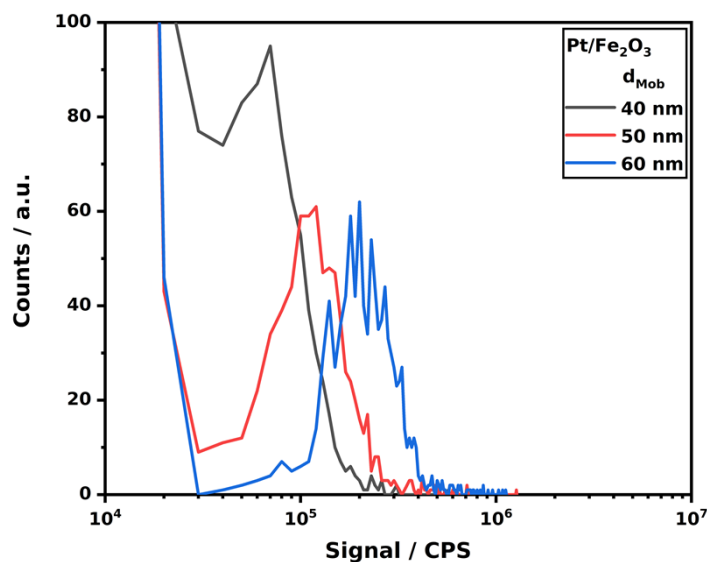

Fig. S5: spICP-MS signal response for Pt/Fe<sub>2</sub>O<sub>3</sub> NPs.

Fig. S4 and S5 show the raw data (signal distributions) for alloyed and segregated NPs, respectively. From the signal distributions shown, the composition of single particles can be calculated.

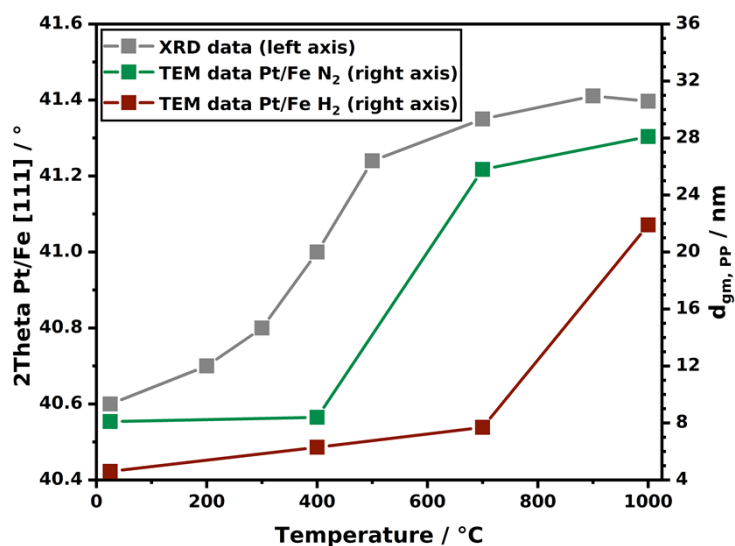

Fig. S6: Peak shift of the Pt/Fe [111] reflex with increasing sintering temperature and primary particle geometric mean diameters of Pt/Fe NPs sintered under N<sub>2</sub> or H<sub>2</sub>, according to Fig. 3 and Fig. S2.

Fig. S6 shows the temperature-resolved peak shift of the Pt/Fe [111] reflex, indicating the formation of Pt/Fe in L1<sub>0</sub> order, as reported by Yu et al.<sup>1</sup> The peak shift implies the L1<sub>0</sub> formation to occur at around 400-600 °C.

## References

- 1 J. Yu, W. Gao, F. Liu, Y. Ju, F. Zhao, Z. Yang, X. Chu, S. Che and Y. Hou, *Sci. China Mater.*, 2018, **61**, 961–968.
